# Supplementary material for: The utility of a ternary phase diagram in the discovery of new co-crystal forms
Source: Royal Society of Chemistry journal article supplement (doi:10.1039/b818268j), 2009-01-01
Supplement: b818268j.pdf [file b818268j.pdf]

| <b>Composition</b> | <b>Mass% Urea</b> | <b>Mass% Glutaric Acid</b> | <b>Mass% Water</b> |
|--------------------|-------------------|----------------------------|--------------------|
| 1                  | 53.9              | 1.2                        | 44.9               |
| 2                  | 60.58             | 4.12                       | 35.3               |
| 3                  | 10.22             | 31.04                      | 58.74              |
| 4                  | 11.82             | 38.99                      | 49.19              |
| 5                  | 3.72              | 54.8                       | 41.48              |
| 6                  | 52.62             | 3.58                       | 43.8               |
| 7                  | 35.65             | 5.01                       | 59.34              |
| 8                  | 21.6              | 6.48                       | 71.92              |
| 9                  | 20.64             | 10.65                      | 68.71              |
| 10                 | 16.96             | 12.44                      | 70.6               |
| 11                 | 15.97             | 17.56                      | 66.47              |
| 12                 | 15.09             | 22.12                      | 62.79              |
| 13                 | 11.98             | 21.56                      | 66.46              |
| 14                 | 11.43             | 25.14                      | 63.43              |
| 15                 | 11.07             | 27.47                      | 61.46              |
| 16                 | 5.6               | 52.54                      | 41.86              |
| 17                 | 6.18              | 48.21                      | 45.61              |
| 18                 | 7.22              | 47.67                      | 45.11              |
| 19                 | 9.1               | 46.71                      | 44.19              |
| 20                 | 9.71              | 43.38                      | 46.91              |
| 21                 | 10.94             | 42.79                      | 46.27              |
| 22                 | 0.61              | 66.06                      | 33.33              |
| 23                 | 1.24              | 65.64                      | 33.12              |

Ternary compositions used to identify all the different solid phase regions in the urea-glutaric acid-water ternary isotherm at 25°C.

| <b>Mass% Urea</b> | <b>Mass% Glutaric acid</b> | <b>Mass% Water</b> |
|-------------------|----------------------------|--------------------|
| 8.1               | 30.7                       | 61.2               |
| 7.9               | 39.3                       | 52.8               |
| 7.5               | 31.7                       | 60.8               |
| 7.5               | 35.9                       | 56.7               |
| 7.4               | 33.7                       | 58.9               |
| 5.7               | 44.5                       | 49.8               |
| 5.2               | 46                         | 48.8               |
| 4.9               | 48                         | 47.1               |
| 49.8              | 0.5                        | 49.7               |
| 34                | 3.2                        | 62.8               |
| 18.7              | 3.2                        | 78.1               |
| 14.9              | 4.3                        | 80.8               |
| 11                | 5.9                        | 83.1               |
| 8.8               | 9.7                        | 81.5               |
| 8.3               | 14.7                       | 77                 |
| 7.8               | 17                         | 75.2               |
| 7.7               | 21                         | 71.3               |
| 0.8               | 54.1                       | 45.1               |
| 1.6               | 54.2                       | 44.2               |

Liquidus compositions for the urea-glutaric acid-water ternary isotherm at 25°C.
